# Supplementary material for: Polygenic determinants in extremes of high-density lipoprotein cholesterol
Source: PubMed Central journal article supplement (PMC5665671; doi:10.1194/jlr.m079822), 2017-09-04
Supplement: 10.1194_M079822_jlr.M079822-1.pdf [file 10.1194_M079822_jlr.M079822-1.pdf]

## SUPPLEMENTAL FIGURES

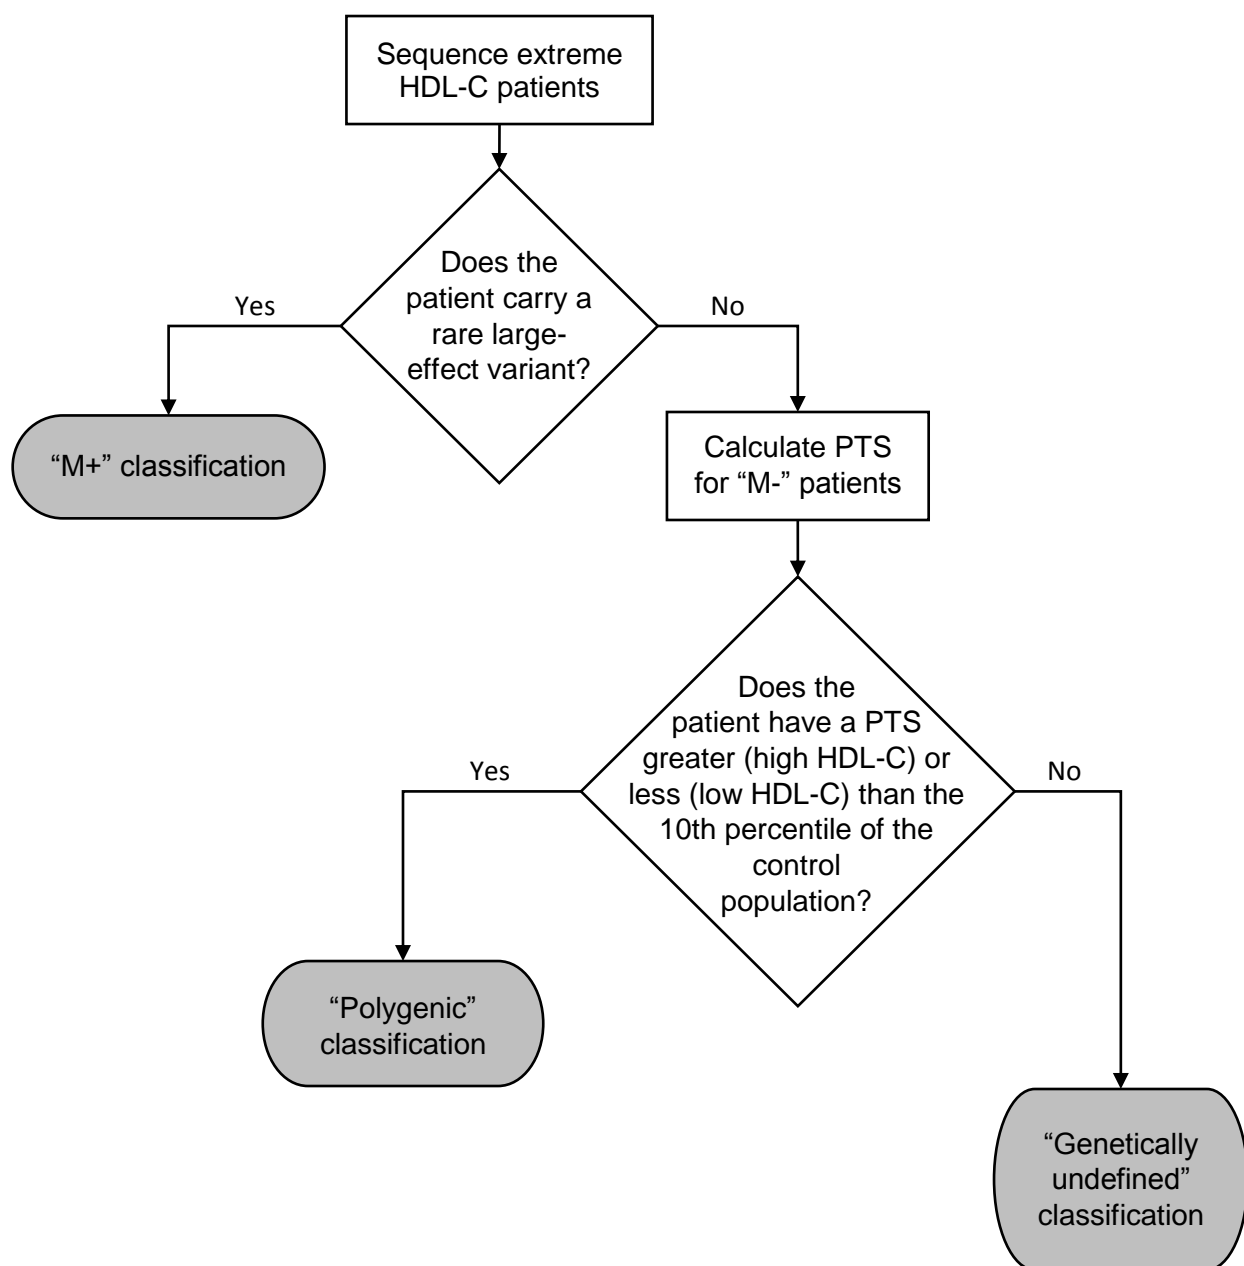

**Supplemental Figure S1.** Process to genetically classify extreme HDL-C patients. HDL-C = HDL cholesterol; M+ = mutation positive; M- = mutation negative; PTS = polygenic trait score.

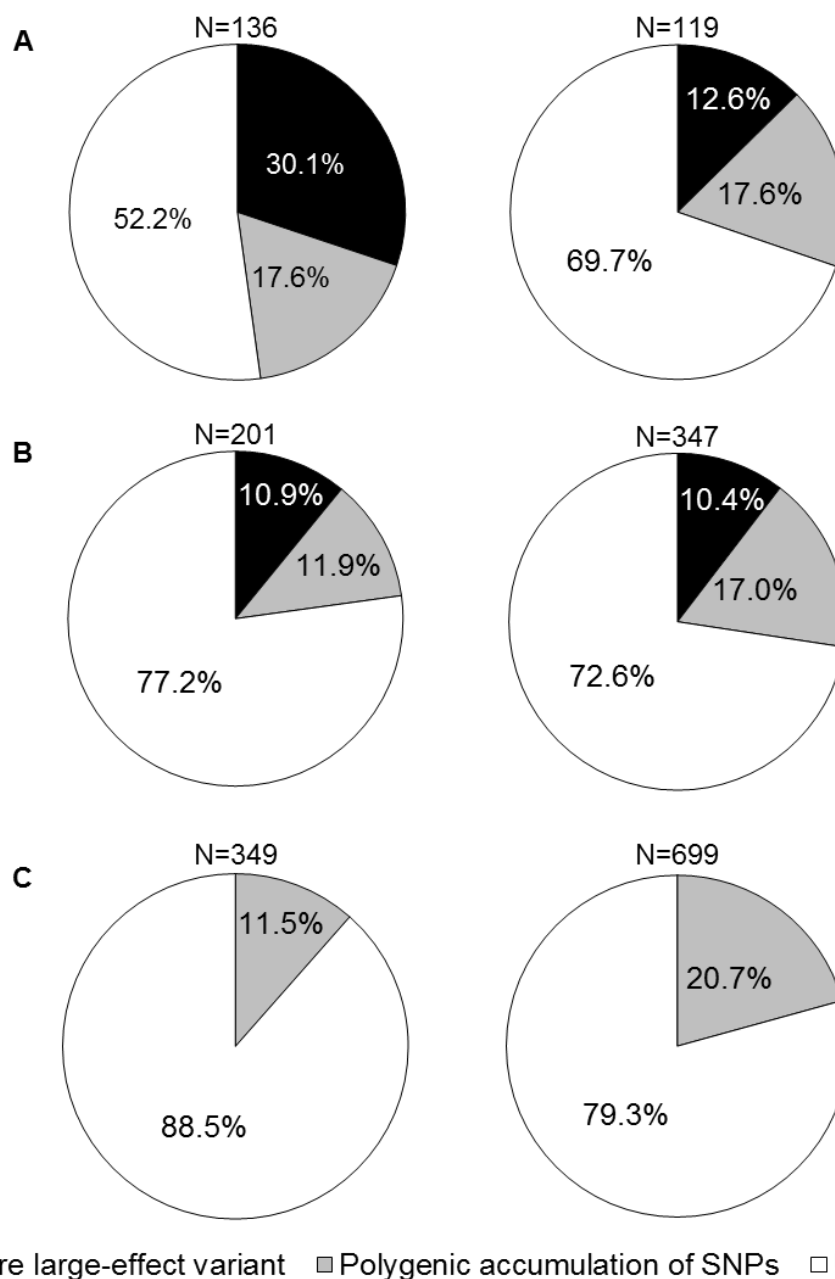

**Supplemental Figure S2.** Genetic determinants of extreme HDL-C phenotypes. Percentages were determined from the low (left) and high (right) HDL-C patients from the **A:** Lipid Genetics Clinic (N=255), **B:** the MHI Biobank cohort (N=548), and **C:** UPenn cohort (N=1,048). It must be noted that the UPenn cohort only consists of M- individuals, meaning that none of the individuals carried rare large-effect variants. HDL-C = HDL cholesterol; M- = mutation negative; MHI = Montréal Heart Institute; SNP = single nucleotide polymorphism; UPenn = University of Pennsylvania.

## SUPPLEMENTAL TABLES

**Supplemental Table S1. Genes with direct (primary) and indirect (secondary) influences on HDL-C levels**

| Influence on HDL-C | Phenotype  | Gene           | Related disorder                              |
|--------------------|------------|----------------|-----------------------------------------------|
|                    |            | <i>ABCA1</i>   | Tangier disease                               |
|                    | Low HDL-C  | <i>APOA1</i>   | Apolipoprotein A-I deficiency                 |
|                    |            | <i>LCAT</i>    | Familial LCAT deficiency                      |
| Primary            |            | <i>LIPC</i>    | Hepatic lipase deficiency                     |
|                    | High HDL-C | <i>SCARB1</i>  | Scavenger receptor B1 deficiency              |
|                    |            | <i>CETP</i>    | Cholesteryl ester transfer protein deficiency |
|                    |            | <i>LIPG</i>    | Hyperalphalipoproteinemia                     |
|                    | Low TG     | <i>APOC3</i>   | Apolipoprotein C-III deficiency               |
| Secondary          |            | <i>LPL</i>     | Lipoprotein lipase deficiency                 |
|                    |            | <i>APOA2</i>   | Apolipoprotein C-II deficiency                |
|                    |            | <i>APOA5</i>   | Apolipoprotein A-V deficiency                 |
|                    | High TG    | <i>LMF1</i>    | Lipase maturation factor deficiency           |
|                    |            | <i>GPIHBP1</i> | Severe hypertriglyceridemia                   |
|                    |            | <i>GPD1</i>    | Infantile hypertriglyceridemia                |
|                    |            | <i>APOE</i>    | Dysbetalipoproteinemia                        |

Genes of interest were selected based on reporting by Johansen CT et al. *J Lipid Res* (2014).

Abbreviations: HDL-C = HDL cholesterol.

**Supplemental Table S2. Summary of likely and definite causative mutations producing extreme HDL-C phenotypes**

| Gene         | Nucleotide change | Amino acid change        | Mutation type | Allele count | HGMD | Prediction outcomes <sup>a</sup>                | Phenotype |
|--------------|-------------------|--------------------------|---------------|--------------|------|-------------------------------------------------|-----------|
| Primary      |                   |                          |               |              |      |                                                 |           |
| <i>ABCA1</i> | c.-357G>A         | p.M1ext-119 <sup>b</sup> | Missense      | 1            |      | 7.3   NA   NA   NA                              | Low HDL-C |
| <i>ABCA1</i> | c.103A>G          | p.I35V                   | Missense      | 1            |      | 22.9   Benign   Damaging   Damaging             | Low HDL-C |
| <i>ABCA1</i> | c.206G>T          | p.W69L                   | Missense      | 2            |      | 26.3   Probably damaging   Damaging   Damaging  | Low HDL-C |
| <i>ABCA1</i> | c.208delG         | p.V70fsX53               | Frameshift    | 2            |      | 22.9   NA   NA   NA                             | Low HDL-C |
| <i>ABCA1</i> | c.688C>T          | p.R230C                  | Missense      | 1            | Yes  | 19.22   Benign   Tolerated   Tolerated          | Low HDL-C |
| <i>ABCA1</i> | c.1660T>C         | p.Y554H                  | Missense      | 1            |      | 27.5   Possibly damaging   Damaging   Damaging  | Low HDL-C |
| <i>ABCA1</i> | c.1770G>C         | p.W590C                  | Missense      | 1            | Yes  | 24.7   Possibly damaging   Damaging   Damaging  | Low HDL-C |
| <i>ABCA1</i> | c.1769G>T         | p.W590L                  | Missense      | 1            | Yes  | 24.7   Possibly damaging   Tolerated   Damaging | Low HDL-C |
| <i>ABCA1</i> | c.2270T>C         | p.L757P                  | Missense      | 2            |      | 28   Probably damaging   Damaging   Damaging    | Low HDL-C |

|              |                      |               |            |   |     |                                                |           |
|--------------|----------------------|---------------|------------|---|-----|------------------------------------------------|-----------|
| <i>ABCA1</i> | c.2328G>C            | p.K776N       | Missense   | 2 | Yes | 27.6   Probably damaging   Damaging   Damaging | Low HDL-C |
| <i>ABCA1</i> | c.2551G>A            | p.G851R       | Missense   | 2 |     | 34   Probably damaging   Damaging   Damaging   | Low HDL-C |
| <i>ABCA1</i> | c.2819C>T            | p.T940M       | Missense   | 1 | Yes | 32   Probably damaging   Damaging   Damaging   | Low HDL-C |
| <i>ABCA1</i> | c.3191A>G            | p.D1064G      | Missense   | 1 |     | 29.5   Probably damaging   Damaging   Damaging | Low HDL-C |
| <i>ABCA1</i> | c.3343_3344del<br>TC | p.S1115PfsX31 | Frameshift | 1 | Yes | 35   NA   NA   NA                              | Low HDL-C |
| <i>ABCA1</i> | c.3544G>A            | p.A1182T      | Missense   | 1 |     | 20.9   Benign   Tolerated   Damaging           | Low HDL-C |
| <i>ABCA1</i> | c.4156G>A            | p.E1386K      | Missense   | 1 |     | 24.7   Benign   Tolerated   Damaging           | Low HDL-C |
| <i>ABCA1</i> | c.4430G>T            | p.C1477F      | Missense   | 1 | Yes | 34   Probably damaging   Damaging   Damaging   | Low HDL-C |
| <i>ABCA1</i> | c.5398A>C            | p.N1800H      | Missense   | 2 | Yes | 26.6   Possibly damaging   Damaging   Damaging | Low HDL-C |
| <i>ABCA1</i> | IVS42+1G>A           |               | Splicing   | 1 |     | 27.2   NA   NA   NA                            | Low HDL-C |
| <i>ABCA1</i> | c.5672A>C            | p.E1891A      | Missense   | 1 |     | 25.2   Probably damaging   Damaging            | Low HDL-C |

|              |                    |              |            |   |     | Damaging                             |            |
|--------------|--------------------|--------------|------------|---|-----|--------------------------------------|------------|
| <i>ABCA1</i> | c.5774G>A          | p.R1925Q     | Missense   | 1 |     | 24.8   Benign   Tolerated   Damaging | Low HDL-C  |
| <i>APOA1</i> | c.85dupC           | p.Q29PfsX29  | Frameshift | 2 | Yes | 28.3   NA   NA   NA                  | Low HDL-C  |
| <i>APOA1</i> | c.535delC          | p.H179MfsX45 | Frameshift | 1 |     | 24.8   Probably damaging   Damaging  | Low HDL-C  |
|              |                    |              |            |   |     | Damaging                             |            |
| <i>APOA1</i> | c.566C>G           | p.P189R      | Missense   | 1 | Yes | 24.8   Probably damaging   Damaging  | Low HDL-C  |
|              |                    |              |            |   |     | Damaging                             |            |
| <i>APOA1</i> | c.718C>T           | p.Q240X      | Nonsense   | 1 | Yes | 35   NA   NA   Damaging              | Low HDL-C  |
| <i>CETP</i>  | c.164delC          | p.S56AfsX11  | Frameshift | 1 |     | 36   NA   NA   Damaging              | High HDL-C |
| <i>CETP</i>  | c.976C>T           | p.Q326X      | Nonsense   | 1 | Yes | 32   NA   NA   NA                    | High HDL-C |
| <i>LCAT</i>  | c.109_110delA<br>C | p.T37AfsX3   | Frameshift | 1 |     | 37   NA   NA   Damaging              | Low HDL-C  |
| <i>LCAT</i>  | c.321C>A           | p.Y107X      | Nonsense   | 1 | Yes | 31   Probably damaging   Tolerated   | Low HDL-C  |
|              |                    |              |            |   |     | Damaging                             |            |
| <i>LCAT</i>  | c.491G>A           | p.R164H      | Missense   | 2 | Yes | 27.8   Probably damaging   Damaging  | Low HDL-C  |
|              |                    |              |            |   |     | Damaging                             |            |
| <i>LCAT</i>  | c.892A>C           | p.T298P      | Missense   | 1 |     | 31   Probably damaging   Damaging    | Low HDL-C  |
|              |                    |              |            |   |     | Damaging                             |            |

|               |           |         |          |   |     |                                                 |            |
|---------------|-----------|---------|----------|---|-----|-------------------------------------------------|------------|
| <i>LCAT</i>   | c.997G>A  | p.V333M | Missense | 1 | Yes | 31   Probably damaging   Damaging   Damaging    | Low HDL-C  |
| <i>LCAT</i>   | c.1039C>T | p.R347C | Missense | 1 | Yes | 18.3   Benign   Damaging   Tolerated   Damaging | Low HDL-C  |
| <i>LCAT</i>   | c.1244A>G | p.N415S | Missense | 1 | Yes | 22.8   Possibly damaging   Tolerated   Damaging | Low HDL-C  |
| <i>LIPC</i>   | c.193C>T  | p.R65X  | Nonsense | 1 |     | 35   NA   NA   Damaging                         | High HDL-C |
| <i>LIPC</i>   | c.866C>T  | p.S289F | Missense | 1 | Yes | 25.5   Probably damaging   Damaging   Damaging  | High HDL-C |
| <i>LIPC</i>   | c.1214C>T | p.T405M | Missense | 3 | Yes | 24.6   Probably damaging   Damaging   Damaging  | High HDL-C |
| <i>LIPC</i>   | c.1231G>C | p.G411R | Missense | 1 |     | 27.5   Probably damaging   Damaging   Damaging  | High HDL-C |
| <i>LIPG</i>   | IVS5+1G>T |         | Splicing | 1 |     | 23.2   NA   NA   Damaging                       | High HDL-C |
| <i>LIPG</i>   | c.1187A>G | p.N396S | Missense | 4 |     | 23.8   Probably damaging   Tolerated   Damaging | High HDL-C |
| <i>SCARB1</i> | c.520C>T  | p.R174C | Missense | 1 |     | 32   Probably damaging   Damaging   Damaging    | High HDL-C |

|               |           |         |          |   |     |                                                 |            |
|---------------|-----------|---------|----------|---|-----|-------------------------------------------------|------------|
| <i>SCARB1</i> | c.1258G>T | p.G420W | Missense | 1 |     | 31   Probably damaging   Damaging   Damaging    | Low HDL-C  |
| Secondary     |           |         |          |   |     |                                                 |            |
| <i>APOA5</i>  | c.944C>T  | p.A315V | Missense | 1 | Yes | 28   Probably damaging   Damaging   Tolerated   | Low HDL-C  |
| <i>APOC3</i>  | IVS2+1G>A |         | Splicing | 2 | Yes | 25.1   NA   NA   Damaging                       | High HDL-C |
| <i>APOE</i>   | c.433G>C  | p.G145R | Missense | 1 |     | 28.4   Probably damaging   Damaging   Tolerated | Low HDL-C  |
| <i>APOE</i>   | c.805C>G  | p.R269G | Missense | 2 | Yes | 25.6   Benign   Damaging   Damaging             | Low HDL-C  |
| <i>GPD1</i>   | c.208C>A  | p.P70T  | Missense | 1 |     | 31   Probably damaging   Damaging   Damaging    | Low HDL-C  |
| <i>GPD1</i>   | c.760G>A  | p.E254K | Missense | 1 |     | 27.7   Probably damaging   Damaging   Damaging  | Low HDL-C  |
| <i>LMF1</i>   | c.1351C>T | p.R451W | Missense | 2 | Yes | 24.9   Probably damaging   Damaging   Tolerated | Low HDL-C  |
| <i>LMF1</i>   | c.1405G>A | p.A469T | Missense | 2 | Yes | 29.7   Probably damaging   Damaging   Damaging  | Low HDL-C  |
| <i>LPL</i>    | c.644G>A  | p.G215E | Missense | 1 | Yes | 22   Probably damaging   Tolerated              | Low HDL-C  |



|            |          |         |          |   |     |                                   |           |
|------------|----------|---------|----------|---|-----|-----------------------------------|-----------|
|            |          |         |          |   |     |                                   | Damaging  |
| <i>LPL</i> | c.701C>T | p.P234L | Missense | 1 | Yes | 34   Probably damaging   Damaging | Low HDL-C |
|            |          |         |          |   |     |                                   | Damaging  |

---

Abbreviations: NA = not available; del = deletion; dup = duplication; ext = extension; fs = frameshift; HDL-C = HDL cholesterol; HGMD =

Human Gene Mutation Database.

<sup>a</sup>The order of prediction tool outcomes is: CADD PHRED Score, PolyPhen2, SIFT, and MutationTaster.

<sup>b</sup>Although this variant does not meet the described criteria for inclusion based on *in silico* prediction tools, it was included due to its sequence ontology of premature start codon.
